# Supplementary figures and images for: Relationship between serum uric acid, all-cause mortality and cardiovascular mortality in peritoneal dialysis patients: systematic review and meta-analysis of cohort studies
Source: HighWire-hosted journal article supplement (doi:10.1136/bmjopen-2021-052274), 2021-10-01

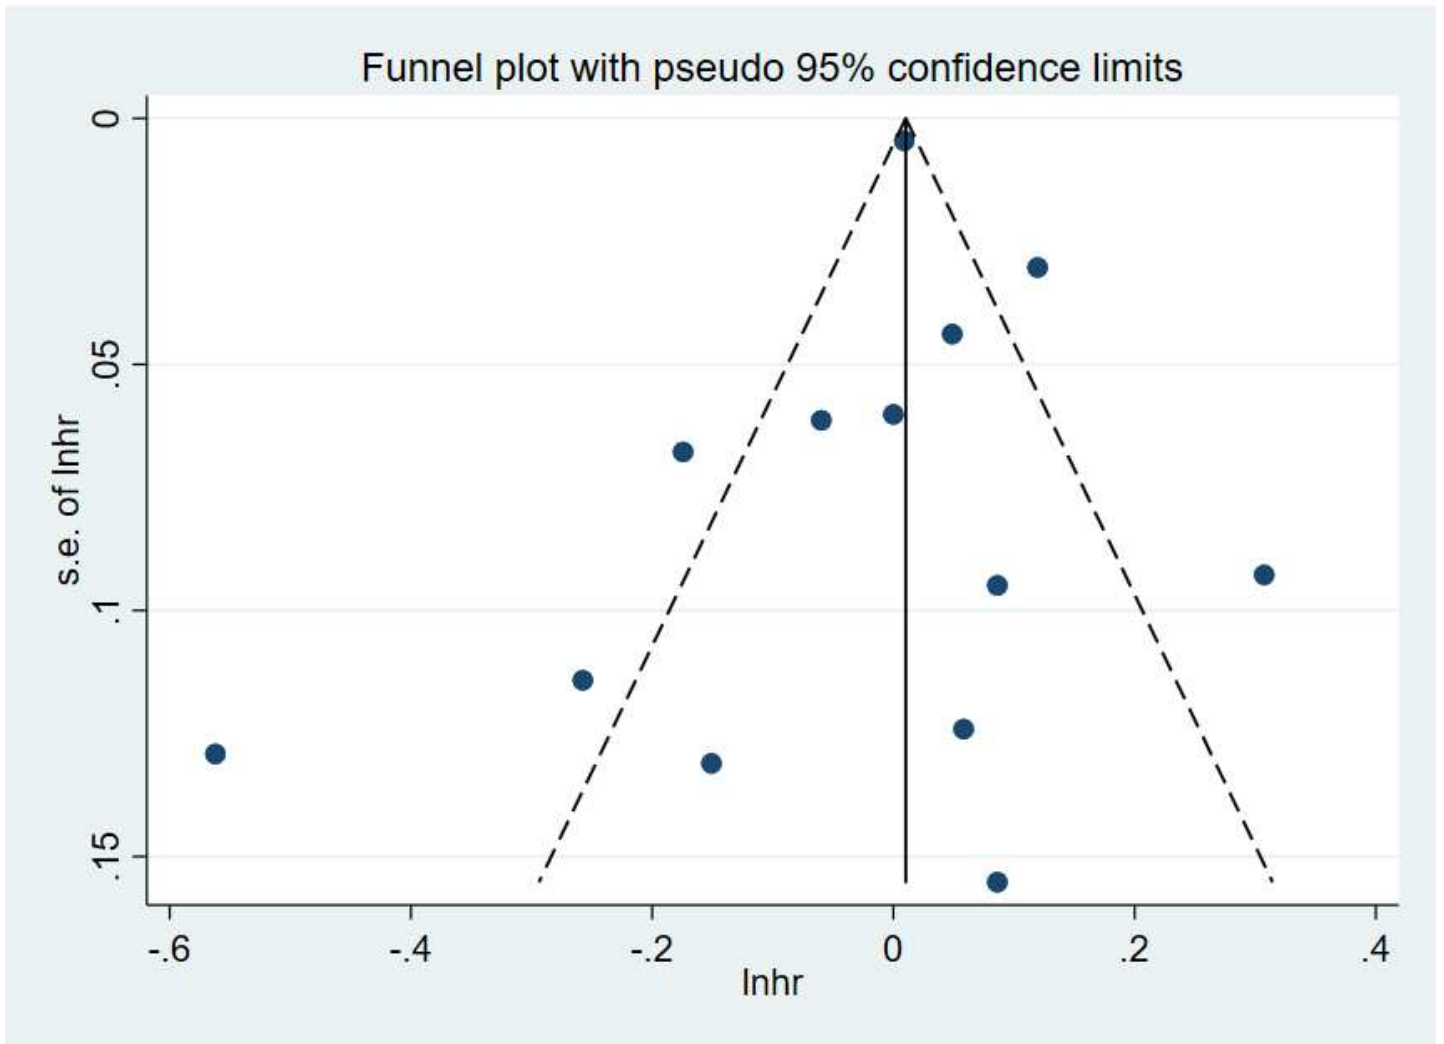

Supplement: bmjopen-2021-052274supp003_data_supplement.pdf [file bmjopen-2021-052274supp003_data_supplement.pdf]
